# Supplementary material
Source: Research Square preprint supplement (doi:10.21203/rs.3.rs-9086863/v1)

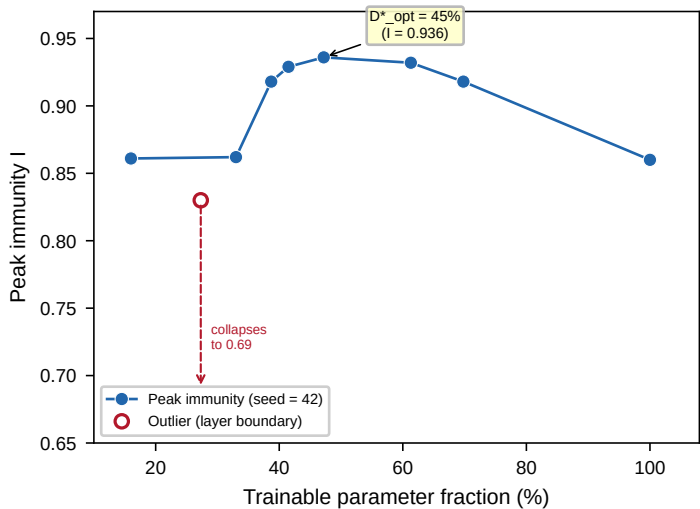

Supplement: Supplementary file 2 [file 8deb92b5904ca94f12b4f01f.pdf]

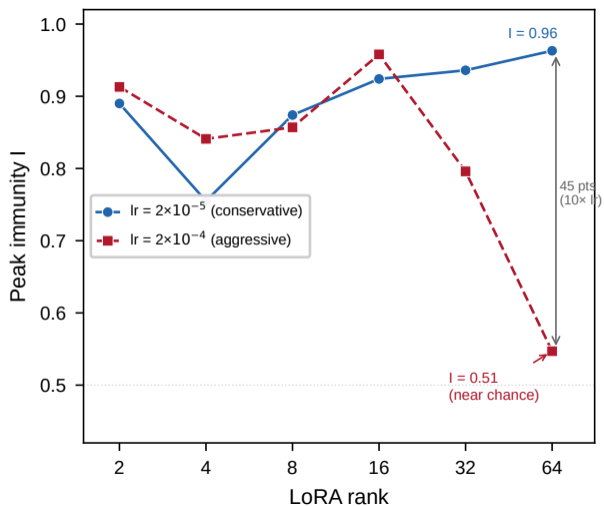

Supplement: Supplementary file 3 [file e3f011a31979b7e754f0c31c.pdf]
